# Supplementary material
Source: PubMed Central journal article supplement (PMC4787710)
Supplement: yanl783514.w1_default.pdf [file yanl783514.w1_default.pdf]

**Web table A** Summary of search syntax

|                                 | <b>Terms for cycling</b>                                                                                                                                                                                                                                                           | <b>Terms for interventions</b>                                                                                                                                                |
|---------------------------------|------------------------------------------------------------------------------------------------------------------------------------------------------------------------------------------------------------------------------------------------------------------------------------|-------------------------------------------------------------------------------------------------------------------------------------------------------------------------------|
| All databases                   | bicycl*<br>bike*<br>biking*<br>cycle hire<br>cycling<br>cyclist*<br>active* commut*<br>active* travel*<br>green* commut*<br>green* transport*<br>green* travel*<br>ecological commut*<br>ecological transport*<br>ecological travel*<br>non-motorised<br>non-motorized<br>non-auto | campaign*<br>encourag*<br>habit*<br>impact*<br>increase*<br>intervention*<br>pattern*<br>policy<br>policies<br>program*<br>project*<br>promot*<br>scheme*<br>shift*<br>start* |
| Medical subject headings (MeSH) | Bicycling                                                                                                                                                                                                                                                                          | Health behaviour<br>Health education<br>Health promotion                                                                                                                      |
| Non-biomedical databases        | cycle*                                                                                                                                                                                                                                                                             |                                                                                                                                                                               |
| TRIS database                   | physical* activ*<br>exercis*                                                                                                                                                                                                                                                       |                                                                                                                                                                               |
