# Supplementary material
Source: PubMed Central journal article supplement (PMC4787710)
Supplement: yanl783514.w2_default.pdf [file yanl783514.w2_default.pdf]

**Web table B** Excluded studies

|    | <b>Study</b>                                                                                                                                                                                                                             | <b>Reason for exclusion</b>                             |
|----|------------------------------------------------------------------------------------------------------------------------------------------------------------------------------------------------------------------------------------------|---------------------------------------------------------|
| 1  | 50 ways to promote bicycling and walking in your community. <i>WAHPERD Newsletter</i> 2002;31:16.                                                                                                                                        | Multiple studies included: used as source of references |
| 2  | Allen GQ, Lipton SG, Brooke B. Unique voucher programs to increase alternative commuting. <i>Transport Res Rec</i> 1999:136-42.                                                                                                          | No control group                                        |
| 3  | Barnes GR, Thompson KB, Krizek K. <i>Longitudinal analysis of effect of bicycle facilities on commute mode share</i> . Transportation Research Board 85th Annual Meeting, 2006.                                                          | No control group                                        |
| 4  | Boarnet MG, Anderson CL, Day K, McMillan T, Alfonzo M. Evaluation of the California safe routes to school legislation: urban form changes and children's active transportation to school. <i>Am J Prev Med</i> 2005;28(suppl 2):134-40S. | No control group                                        |
| 5  | Boarnet MG, Day K, Anderson C, McMillan T, Alfonzo M. California's safe routes to school program: impacts on walking, bicycling, and pedestrian safety. <i>J Am Plann Assoc</i> 2005;71:301-17.                                          | No control group                                        |
| 6  | Bowles HR, Rissel C, Bauman A. Mass community cycling events: who participates and is their behaviour influenced by participation? <i>Int J Behav Nutr Phys Act</i> 2006;3:39.                                                           | No control group                                        |
| 7  | Boyd B, Chow M, Johnson R, Smith A. Analysis of effects of fare-free transit program on student commuting mode shares: Bruingo at University of California at Los Angeles. <i>Transport Res Rec</i> 2003:101-10.                         | No relevant intervention                                |
| 8  | Brog W, Erl E, Mense N. Individualised marketing: Changing travel behaviour for a better environment. <i>OECD Workshop: Environmentally Sustainable Transport</i> , 2002 5-06 December, Berlin, Germany. Social Data, 2002.              | Multiple studies included: used as source of references |
| 9  | Bunde J. The BikeBus'ters from Aarhus, Denmark: "We'll Park Our Cars for 200 Years..." In: Tolley R, ed. <i>The Greening of Urban Transport</i> . Wiley, 1997. p. 373-7.                                                                 | No control group                                        |
| 10 | Burbidge SK. Evaluating the impact of neighborhood trail development on active travel behavior and overall physical activity [PhD thesis]. University of California, 2008.                                                               | No control group                                        |
| 11 | Cameron M, Vulcan AP, Finch CF, Newstead SV. Mandatory bicycle helmet use following a decade of helmet promotion in Victoria, Australia—an evaluation. <i>Accid</i>                                                                      | No relevant intervention                                |

---

*Anal Prev* 1994;26:325-37.

|    |                                                                                                                                                                                                                                                                                  |                                                         |
|----|----------------------------------------------------------------------------------------------------------------------------------------------------------------------------------------------------------------------------------------------------------------------------------|---------------------------------------------------------|
| 12 | Cleary J, McClintock H. Evaluation of the Cycle Challenge Project: a Case Study of the Nottingham cycle-friendly employers' project. <i>Transport Policy</i> 2000;7:117-15.                                                                                                      | No control group                                        |
| 13 | Cohen D, Sehgal A, Williamson S, Golinelli D, McKenzie TL, Capone-Newton P, et al. Impact of a new bicycle path on physical activity. <i>Prev Med</i> 2008;46:80-1.                                                                                                              | Multiple studies included: used as source of references |
| 14 | Cooper C. Successfully changing individual travel behavior: applying community-based social marketing to travel choice. <i>Transport Res Rec</i> 2007:89-99.                                                                                                                     | No control group                                        |
| 15 | Danish city significantly increases cycling. <i>Urban Transportation Monitor</i> 2003;17:1-2.                                                                                                                                                                                    | No relevant outcome                                     |
| 16 | Darling H, Richards R. Kids on bikes: a community intervention. <i>Prev Med</i> 2008;46:82.                                                                                                                                                                                      | No control group                                        |
| 17 | de Cerreno ALC, Nguyen-Novotny MLH. <i>Pedestrian and bicyclist standards and innovations in large central cities</i> . Rudin Center for Transportation Policy & Management, NYU Robert F. Wagner Graduate School of Public Service, 2006.                                       | Multiple studies included: used as source of references |
| 18 | Dijkstra A, Levelt P, Thomsen J, Thorson O, Severen JV, Vansevenant P, et al. <i>Analysis and development of new insight into substitution of short car trips by cycling and walking (ADONIS): best practice to promote cycling and walking</i> . Danish Road Directorate, 1998. | No relevant intervention                                |
| 19 | Dill J, Wardell E. Factors affecting work site mode choice: findings from Portland, Oregon. <i>Transport Res Rec</i> 2007:51-7.                                                                                                                                                  | No control group                                        |
| 20 | Douma F, Cleaveland F. <i>The impact of bicycling facilities on commute mode share</i> . Minnesota Department of Transportation, 2008.                                                                                                                                           | No control group                                        |
| 21 | Eikeland M. The introduction of a public bike in Sandnes, Norway: experiences and lessons from the first year. In: Tolley R, ed. <i>The Greening of Urban Transport</i> . Wiley, 1997. p. 379-84.                                                                                | No relevant outcome                                     |
| 22 | European Conference of Ministers of Transport. <i>Implementing sustainable urban travel policies: moving ahead. national policies to promote cycling</i> . OECD Publishing, 2004.                                                                                                | No relevant intervention                                |
| 23 | Evenson KR, Herring AH, Huston SL. Evaluating change in physical activity with the building of a multi-use trail. <i>Am J Prev Med</i> 2005;28(suppl 2):177-85.                                                                                                                  | No control group                                        |
| 24 | Ewing R, Greene, W. <i>Travel and environmental implications of school siting</i> . US Environmental Protection Agency, 2003.                                                                                                                                                    | No relevant intervention                                |

---

|    |                                                                                                                                                                                                                                                                                                                      |                                                         |
|----|----------------------------------------------------------------------------------------------------------------------------------------------------------------------------------------------------------------------------------------------------------------------------------------------------------------------|---------------------------------------------------------|
| 25 | National Bicycling and Walking Study. <i>Final report: analyses of successful provincial, state, and local bicycle and pedestrian programs in Canada and the United States</i> . Case Study No. 18. Federal Highway Administration, 1993.                                                                            | Multiple studies included: used as source of references |
| 26 | Foster C, Hillsdon M. Changing the environment to promote health-enhancing physical activity. <i>J Sports Sci</i> 2004;22:755-69.                                                                                                                                                                                    | Multiple studies included: used as source of references |
| 27 | <i>Four commonly used methods to increase physical activity: brief interventions in primary care, exercise referral schemes, pedometers and community-based exercise programmes for walking and cycling</i> . Public Health Intervention Guidance no.2. National Institute for Health and Clinical Excellence, 2006. | No relevant intervention                                |
| 28 | Frank LD, Engelke PO. The built environment and human activity patterns: exploring the impacts of urban form on public health. <i>J Plann Lit</i> 2001;16:202-18.                                                                                                                                                    | No relevant intervention                                |
| 29 | Fritzel A. Examination of the integration of cycling and transit in four Canadian cities. Transportation and sustainable communities for the transportation professional. <i>Proceedings of the 1997 ITE International Conference; 1997 March; Tampa, FL, USA</i> . p. 77-82.                                        | No relevant intervention                                |
| 30 | Gaffron P. The implementation of walking and cycling policies in British local authorities. <i>Transport Policy</i> 2003;10:235-44.                                                                                                                                                                                  | No relevant intervention                                |
| 31 | Gordon PM, Zizzi SJ, Pauline J. Use of a community trail among new and habitual exercisers: a preliminary assessment. <i>Prev Chronic Dis</i> 2004;1:A11.                                                                                                                                                            | No control group                                        |
| 32 | Greig R. Cycling promotion in Western Australia. <i>Health Promot J Aust</i> 2001;12:250-3.                                                                                                                                                                                                                          | No control group                                        |
| 33 | Gutierrez N, Orenstein MR, Cooper JF, Rice TM, Ragland DR. Pedestrian and bicyclist safety effects of the California Safe Routes to School program. <i>Proceedings of the Transportation Research Board 87th Annual Meeting; 2008 January 13-17; Washington DC, USA</i> . Transportation Research Board, 2008.       | No relevant intervention                                |
| 34 | Hartman J. The Delft Bicycle Network Revisited. In: Tolley R, ed. <i>The Greening of Urban Transport</i> . Wiley, 1997. p. 299-306.                                                                                                                                                                                  | Insufficient usable data                                |
| 35 | Heath GW, Brownson RC, Jruger J, Miles R, Pwell KE, Ramsey LT, et al. The effectiveness of urban design and land use and transport policies and practices to increase physical activity: a systematic review. <i>J Phys Activ Health</i> 2006;3(suppl 1):55-76S.                                                     | Multiple studies included: used as source of references |
| 36 | Heran F. The cyclable city: concept, conditions and impacts. <i>Recherche-transport-</i>                                                                                                                                                                                                                             | No relevant intervention                                |

---

|    |                                                                                                                                                                                                                                                                                                                                                                                             |                          |
|----|---------------------------------------------------------------------------------------------------------------------------------------------------------------------------------------------------------------------------------------------------------------------------------------------------------------------------------------------------------------------------------------------|--------------------------|
|    | <i>sécurité</i> 1995;47:35-50.                                                                                                                                                                                                                                                                                                                                                              |                          |
| 37 | Hidalgo D. Structural change in Bogota's transportation systems: public and non-motorized transportation priority and private car restrictions. <i>Proceedings of the Second International Conference on Urban Public Transportation Systems: Ensuring Sustainability Through Mass Transit; 2002 April 14-18; Alexandria, VA, USA.</i> American Society of Civil Engineers, 2004. p. 26-36. | No control group         |
| 38 | Intermodal commuter solutions tested with California PATH's EasyConnect project. <i>Urban Transportation Monitor</i> 2006;20:3.                                                                                                                                                                                                                                                             | No control group         |
| 39 | Katsev R, Brook D, Nice M. The effects of car sharing on travel behaviour: analysis of Carsharing Portland's first year. <i>World Transport Policy Pract</i> 2001;7:22-8.                                                                                                                                                                                                                   | No control group         |
| 40 | la Cour Lund B, Nilsson PK. Best practice to promote and secure cycling and walking. <i>Proceedings of the Traffic Safety on Two Continents Conference; 2000.</i> p. 1-8.                                                                                                                                                                                                                   | No control group         |
| 41 | Lambert RA. The medical mile of the Arkansas river trail: doctors can do something about obesity and inactivity. <i>J Ark Med Soc</i> 2004;101:177-80.                                                                                                                                                                                                                                      | No relevant intervention |
| 42 | Lane C. PhillyCarShare: first-year social and mobility impacts of carsharing in Philadelphia, Pennsylvania. <i>Transport Res Rec</i> 2005:158-66.                                                                                                                                                                                                                                           | No control group         |
| 43 | Lawlor DA, Ness AR, Cope AM, Davis A, Insall P, Riddoch C. The challenges of evaluating environmental interventions to increase population levels of physical activity: the case of the UK National Cycle Network. <i>J Epidemiol Community Health</i> 2003;57:96-101.                                                                                                                      | No relevant outcome      |
| 44 | Macbeth AG. Bicycle lanes in Toronto. <i>ITE Journal</i> 1999;69:38-46.                                                                                                                                                                                                                                                                                                                     | No control group         |
| 45 | Marshall G. Promoting cycling for health and fitness. <i>Health Promot J Aust</i> 2001;12:258-60.                                                                                                                                                                                                                                                                                           | No control group         |
| 46 | McManus A, Smith J, McManus J, MacDonald E, Williams M. Evaluation of an alternative transport initiative in Perth, Western Australia, 2000-2004. <i>Health Promot J Aust</i> 2005;16:184-8.                                                                                                                                                                                                | No control group         |
| 47 | Merom D, Bauman A, Vita P, Close G. An environmental intervention to promote walking and cycling: the impact of a newly constructed Rail Trail in Western Sydney. <i>Prev Med</i> 2003;36:235-42.                                                                                                                                                                                           | No control group         |
| 48 | Merom D, Miller YD, van der Ploeg HP, Bauman A. Predictors of initiating and maintaining active commuting to work using transport and public health perspectives                                                                                                                                                                                                                            | No control group         |

---

---

|    |                                                                                                                                                                                                                                      |                                                         |
|----|--------------------------------------------------------------------------------------------------------------------------------------------------------------------------------------------------------------------------------------|---------------------------------------------------------|
|    | in Australia. <i>Prev Med</i> 2008;47(3):342-346.                                                                                                                                                                                    |                                                         |
| 49 | Mutrie N, Carney C, Blamey A, Crawford F, Aitchison T, Whitelaw A. "Walk in to Work Out": a randomised controlled trial of a self help intervention to promote active commuting. <i>J Epidemiol Community Health</i> 2002;56:407-12. | Insufficient usable data                                |
| 50 | Nadal L. Velib one year later. <i>Sustainable Transport</i> 2008:8-9.                                                                                                                                                                | No relevant outcome                                     |
| 51 | Newsome P. <i>Bicycle commuting in three North American Cities: Madison, Boulder, Toronto</i> . Minnesota Department of Transportation, 1999.                                                                                        | No relevant outcome                                     |
| 52 | Noland RB, Ishaque MM. Smart bicycles in an urban area: evaluation of a pilot scheme in London. <i>J Public Transport</i> 2006;9:71-95.                                                                                              | No control group                                        |
| 53 | Ogilvie D, Egan M, Hamilton V, Petticrew M. Promoting walking and cycling as an alternative to using cars: systematic review. <i>BMJ</i> 2004;329:763-7.                                                                             | Multiple studies included: used as source of references |
| 54 | Oja P, Vuori I, Paronen O. Daily walking and cycling to work: their utility as health-enhancing physical activity. <i>Patient Educ Couns</i> 1998;33(suppl):87-94S.                                                                  | No control group                                        |
| 55 | Orenstein MR, Gutierrez N, Rice TM, Cooper JF, Ragland DR. <i>Safe routes to school: safety and mobility analysis. Report to the California legislature</i> . California Department of Transportation, 2007.                         | No control group                                        |
| 56 | Papoulias DB, Dix MC. Results of surveys in Oxford to investigate the impact of bus lane schemes. <i>Traffic Engineering Control</i> 1978;19:26-31.                                                                                  | No relevant outcome                                     |
| 57 | Parker J. <i>Making personal travel planning work: research report</i> . Department of Transport, 2007.                                                                                                                              | Multiple studies included: used as source of references |
| 58 | Parra D, Gomez L, Pratt M, Sarmiento OL, Mosquera J, Triche E. Policy and built environment changes in Bogota and their importance in health promotion. <i>Indoor Built Environ</i> 2007;16:344-8.                                   | No relevant outcome                                     |
| 59 | Pucher J, Buehler R. Cycling trends and policies in Canadian cities. <i>World Transport Policy Pract</i> 2005;11:43-61.                                                                                                              | Insufficient usable data                                |
| 60 | Pucher J, Buehler R. Sustainable transport in Canadian cities: cycling trends and policies. <i>Berkeley Plann J</i> 2006;19:97-123.                                                                                                  | Insufficient usable data                                |
| 61 | Pucher J, Buehler R. At the frontiers of cycling: policy innovations in the Netherlands, Denmark and Germany. <i>World Transport Policy Pract</i> 2007;13:8-56.                                                                      | Insufficient usable data                                |
| 62 | Pucher J, Dill J, Handy S. Infrastructure, programs, and policies to increase bicycling: an international review. <i>Prev Med</i> 2009;50(suppl 1):106-25S.                                                                          | Multiple studies included: used as source of references |
| 63 | Pucher J. Bicycling boom in Germany: a revival engineered by public policy.                                                                                                                                                          | Insufficient usable data                                |

---

---

|    |                                                                                                                                                                                                                                                             |                                                         |
|----|-------------------------------------------------------------------------------------------------------------------------------------------------------------------------------------------------------------------------------------------------------------|---------------------------------------------------------|
|    | <i>Transport Q</i> 1997;51:31-46.                                                                                                                                                                                                                           |                                                         |
| 64 | Pucher J. Urban transport in Germany: providing feasible alternatives to the car. <i>Transport Rev</i> 1998;18:285-310.                                                                                                                                     | Insufficient usable data                                |
| 65 | Quenault SW, Morgan JM. <i>Cycle routes in Peterborough: interim report</i> . Transport and Road Research Laboratory, 1979.                                                                                                                                 | Insufficient usable data                                |
| 66 | Richardson E. The role of TDM in maintaining accessibility in Australia and New Zealand. <i>ITE 2005 Annual Meeting and Exhibit Compendium of Technical Papers; 2005 February 27-March 2; Las Vegas, NV, USA</i> .                                          | Insufficient usable data                                |
| 67 | Rissel C, Garrard J. Cycling for active transport and recreation in Australia: status review and future directions. <i>World Transport Policy Pract</i> 2006;13:49-63.                                                                                      | Multiple studies included: used as source of references |
| 68 | Robinson FO, Edwards JL, Ohrn CE. Strategies for increasing levels of walking and bicycling for utilitarian purposes. <i>Transport Res Rec</i> 1980:38-48.                                                                                                  | No relevant intervention                                |
| 69 | Rose G, Marfurt H. Travel behaviour change impacts of a major ride to work day event. <i>Transport Res A</i> 2007;41:351-64.                                                                                                                                | No control group                                        |
| 70 | Rowland D, DiGuseppi C, Gross M, Afolabi E, Roberts I. Randomised controlled trial of site specific advice on school travel patterns. <i>Arch Dis Child</i> 2003;88:8-11.                                                                                   | Insufficient usable data                                |
| 71 | Russo R, Berman S. Downtown Brooklyn traffic calming implementation: calming Clinton Street with the Traffic Engineering Toolbox. <i>ITE 2006 Technical Conference and Exhibit Compendium of Technical Papers; 2006 March 19-22; San Antonio, TX, USA</i> . | Insufficient usable data                                |
| 72 | Safer junction design encouraged bicycling in Gothenburg. <i>Proceedings of the Traffic Safety on Two Continents Conference; 1997 Sept. 22-24; Lisbon, Portugal</i> . Swedish National Road and Transport Research Institute, 1997.                         | No control group                                        |
| 73 | Sammer G. Experience of the city of Graz in cycling promotion. <i>Vélo Mondiale</i> 1992:501-4.                                                                                                                                                             | No control group                                        |
| 74 | Schwanen T, Dijst M, Dieleman FM. Policies for urban form and their impact on travel: the Netherlands experience. <i>Urban Stud</i> 2004;41:579-603.                                                                                                        | Insufficient usable data                                |
| 75 | Shaheen SA, Rodier CJ. <i>EasyConnect: low-speed modes linked to transit planning project</i> . California PATH Working Paper. California PATH Program of the University of California, 2006.                                                               | No control group                                        |
| 76 | Staunton CE, Hubsmith D, Kallins W. Promoting safe walking and biking to school: the Marin County success story. <i>Am J Public Health</i> 2003;93:1431-4.                                                                                                  | No control group                                        |

---

|    |                                                                                                                                                                                                                                                                     |                                              |
|----|---------------------------------------------------------------------------------------------------------------------------------------------------------------------------------------------------------------------------------------------------------------------|----------------------------------------------|
| 77 | Taniguchi A, Fujii S. Analysis of effects on workplace mobility management targeting commuter transport. <i>Proceedings of the Transportation Research Board 86th Annual Meeting; 2007 January 21-25; Washington DC, USA</i> . Transportation Research Board, 2007. | No control group                             |
| 78 | Targeted health promotion activities encourage people to walk and cycle instead of using cars. <i>Evidence-Based Healthcare and Public Health</i> 2005;9:139-40.                                                                                                    | No relevant intervention                     |
| 79 | Topp HH. Can MeetBike replace the car? <i>World Transport Policy Pract</i> 2008;14:24-31.                                                                                                                                                                           | No relevant intervention                     |
| 80 | National Institute for Health and Clinical Excellence. <i>Transport interventions promoting safe cycling and walking: evidence briefing</i> . National Institute for Health and Clinical Excellence, 2006.                                                          | No relevant intervention                     |
| 81 | Van Staveren T. Steps in the right direction: lessons from Europe on encouraging cycling and walking. <i>Parks Recreation</i> 2003;38:18-25.                                                                                                                        | No relevant intervention                     |
| 82 | Very successful bike rental program in Paris cuts traffic, pollution. <i>Urban Transportation Monitor</i> 2007;21:7-8.                                                                                                                                              | Insufficient usable data                     |
| 83 | Voss C, Sandercock G. Aerobic fitness and mode of travel to school in English schoolchildren. <i>Med Sci Sports Exerc</i> 2010;42:281-7.                                                                                                                            | No relevant intervention                     |
| 84 | Vulcan AP, Cameron MH, Watson WL. Mandatory bicycle helmet use: experience in Victoria, Australia. <i>World J Surg</i> 1992;16:389-97.                                                                                                                              | No relevant intervention                     |
| 85 | Wang G, Macera CA, Scudder-Soucie B, Schmid T, Pratt M, Buchner D. Cost effectiveness of a bicycle/pedestrian trail development in health promotion. <i>Prev Med</i> 2004;38:237-42.                                                                                | No relevant outcome                          |
| 86 | Wardman M, Tight M, Page M. Factors influencing the propensity to cycle to work. <i>Transport Res A</i> 2007;41:339-50.                                                                                                                                             | Insufficient usable data                     |
| 87 | Welleman T. The Dutch Bicycle Master Plan 1990-1996. In: Tolley R, ed. <i>The Greening of Urban Transport</i> . Wiley, 1997. p. 177-190.                                                                                                                            | Insufficient usable data                     |
| 88 | Wen LM, Fry D, Merom D, Rissel C, Dirkis H, Balafas A. Increasing active travel to school: Are we on the right track? A cluster randomised controlled trial from Sydney, Australia. <i>Prev Med</i> 2008;47:612-8.                                                  | Insufficient usable data                     |
| 89 | Wen LM, Orr N, Bindon J, Rissel C. Promoting active transport in a workplace setting: evaluation of a pilot study in Australia. <i>Health Promot Int</i> 2005;20:123-33.                                                                                            | Insufficient usable data                     |
| 90 | National Cycling and Walking Study. <i>What needs to be done to promote bicycling</i>                                                                                                                                                                               | Multiple studies included: used as source of |

|    |                                                                                                                                                                                                    |                  |
|----|----------------------------------------------------------------------------------------------------------------------------------------------------------------------------------------------------|------------------|
|    | <i>and walking?</i> Case Study No. 3. Federal Highway Administration, 1992.                                                                                                                        | references       |
| 91 | Wynne GG for the National Bicycling and Walking Study. <i>A study of bicycle and pedestrian programs in European countries.</i> Case Study No. 16. Federal Highway Administration, 1992.           | No control group |
| 92 | York region pedestrian and cycling master plan: towards a more sustainable future. <i>Proceedings of the Annual Conference of the Transportation Association of Canada; 2008; Toronto, Canada.</i> | No control group |
| 93 | Zacharias J. Bicycle in Shanghai: movement patterns, cyclist attitudes and the impact of traffic separation. <i>Transport Rev</i> 2002;22:309-22.                                                  | No control group |

Some studies were excluded on more than one criterion. Only one reason for exclusion is recorded for each study in this table.
